# Supplementary material for: Novelly developed three-dimensional carbon scaffold anodes from polyacrylonitrile for microbial fuel cells
Source: Royal Society of Chemistry journal article supplement (doi:10.1039/c4ta06007e), 2015-01-01
Supplement: c4ta06007e1.pdf [file c4ta06007e1.pdf]

**Supplementary information**

**Novelly Developed Three-Dimensional Carbon Scaffold Anodes  
from Polyacrylonitrile for Microbial Fuel Cells**

**Ya-Qiong Wang,<sup>a</sup> Han-Xiong Huang,<sup>✉a</sup> Bin Li<sup>b</sup> Wei-Shan Li<sup>b,c</sup>**

<sup>a</sup> *Lab for Micro Molding and Polymer Rheology, The Key Laboratory of Polymer Processing Engineering of the Ministry of Education, South China University of Technology, Guangzhou, 510640, China. Email: [mmhuang@scut.edu.cn](mailto:mmhuang@scut.edu.cn); Fax: +86-20-22236799.*

<sup>b</sup> *School of Materials Science and Engineering, South China University of Technology, Guangzhou 510640, China*

<sup>c</sup> *School of Chemistry and Environment, South China Normal University, Guangzhou 510006, China*

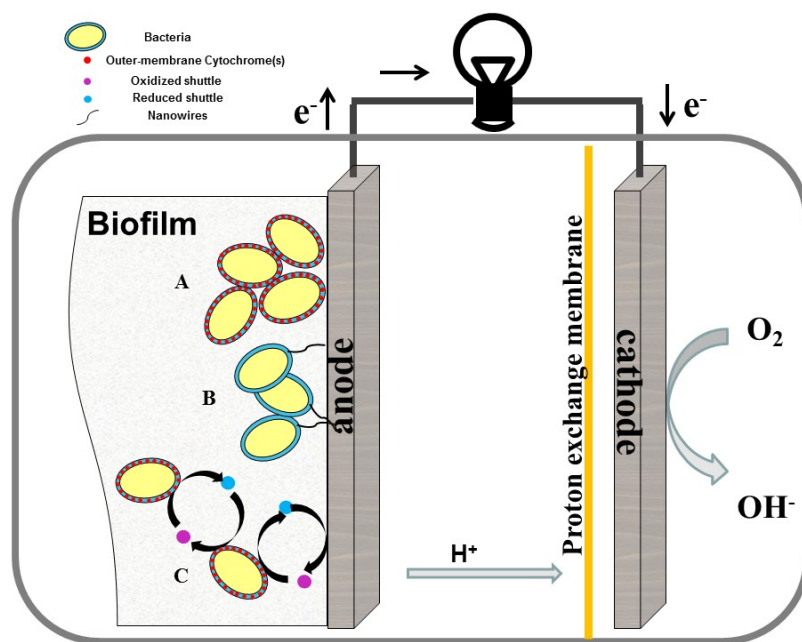

**Fig. S1** Schematic of classic single-chamber microbial fuel cells (MFCs), related to biofilm mechanism of current generation in MFCs.

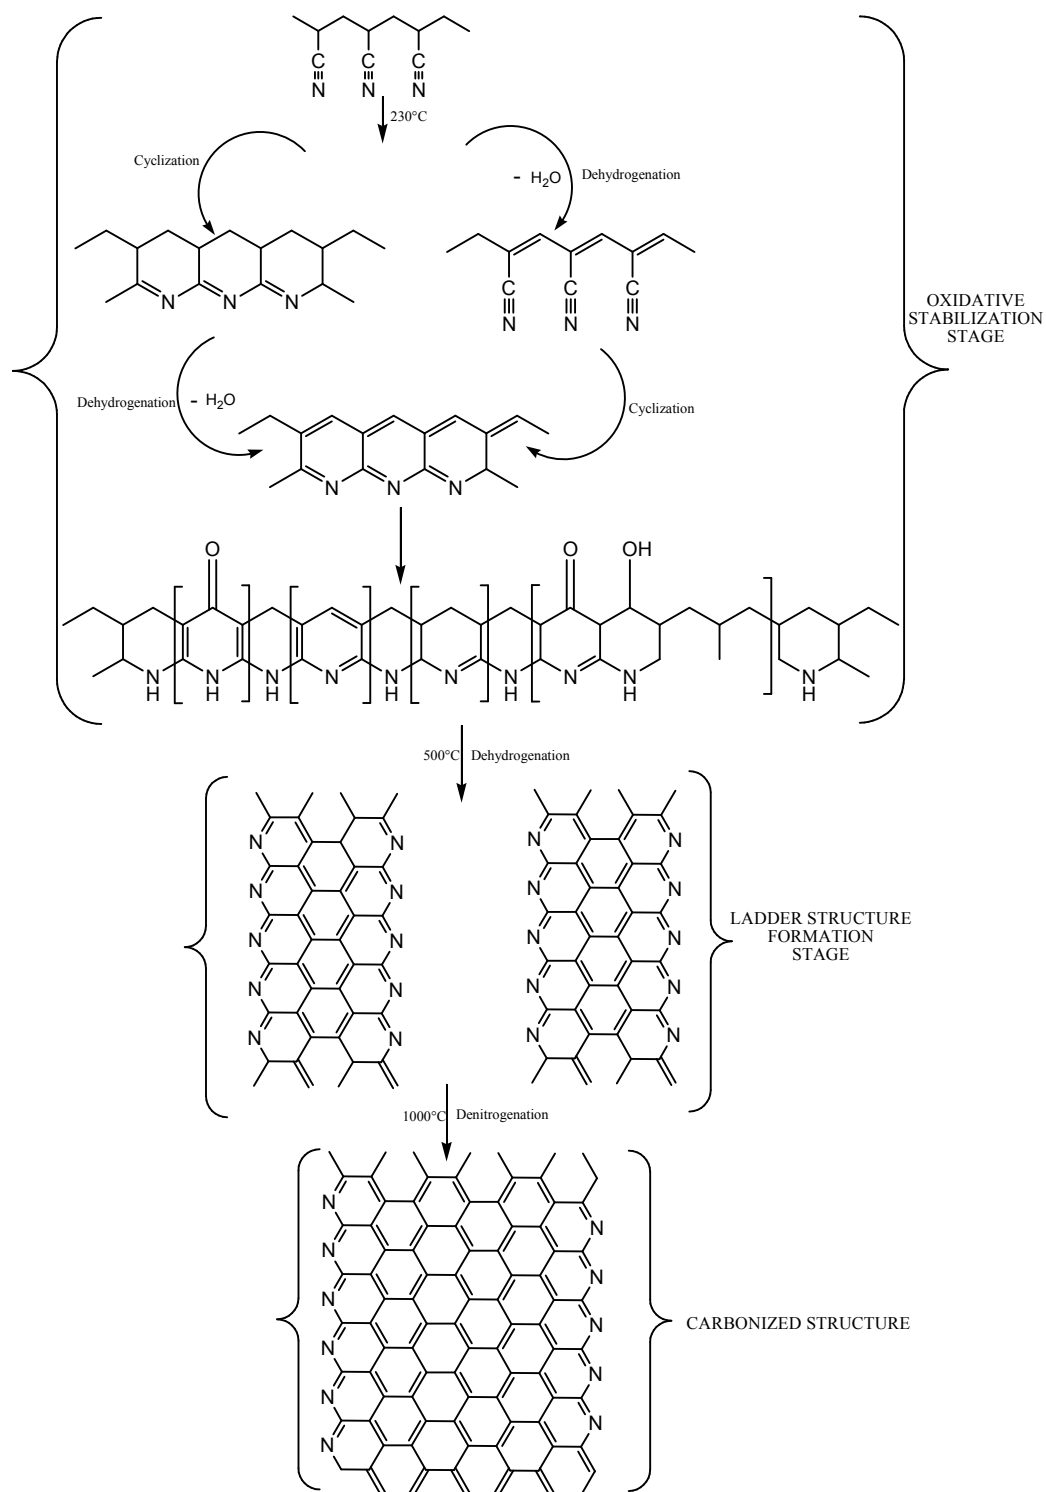

**Fig. S2** Representation of stages involved in CS formation.
